# Supplementary material
Source: publisher figshare collection journal article supplement (https://gsajournals.figshare.com/ndownloader/files/21677814)
Supplement: Supplementary file 1 [file 21677814]

chr1	214701375	70	0
chr10	103745917	28	0
chr11	68864707	29	0
chr12	83603808	30	0
chr13	103893473	42	0
chr14	70853943	16	0
chr15	88640724	34	0
chr16	45784276	12	0
chr17	69133140	16	0
chr18	72444150	20	0
chr19	68937429	24	0
chr2	225582790	94	0
chr20	79033276	14	0
chr21	62548349	18	0
chr22	54904812	18	0
chr23	53701227	6	0
chr24	27123610	4	0
chr25	58263816	12	0
chr26	76958368	20	0
chr27	50221267	20	0
chr3	205080690	50	0
chr4	166642186	72	0
chr5	143278944	34	0
chr6	163261726	58	0
chr7	83540442	26	0
chr8	128409435	36	0
chr9	94531929	28	0
chrX	120050768	6	0
chrUn0001	13814914	10	0
chrUn0002	13306439	4	0
chrUn0003	12789886	2	0
chrUn0004	12366155	2	0
chrUn0005	12172725	6	0
chrUn0006	10967514	12	0
chrUn0007	11040415	2	0
chrUn0008	10681847	0	0
chrUn0009	10670271	6	0
chrUn0010	10329491	2	0
chrUn0011	10419729	8	0
chrUn0012	9441971	0	0
chrUn0013	8653747	0	0
chrUn0014	8685383	2	0
chrUn0015	7794654	0	0
chrUn0016	7591568	0	0
chrUn0017	6926877	2	0
chrUn0018	7055517	2	0
chrUn0019	6682346	6	0
chrUn0020	6641774	2	0
chrUn0021	6067119	0	0
chrUn0022	5835957	0	0
chrUn0023	5699455	2	0
chrUn0024	5582385	0	0
chrUn0025	5552819	3	0
chrUn0026	5265885	0	0
chrUn0027	5173823	0	0
chrUn0028	5077780	2	0
chrUn0029	5064603	2	0
chrUn0030	5306716	0	0
chrUn0031	5047531	0	0
chrUn0032	4564343	0	0
chrUn0033	4085898	6	0
chrUn0034	3992700	2	0
chrUn0035	3937829	0	0
chrUn0036	3668269	2	0
chrUn0037	3519391	0	0
chrUn0038	3474990	0	0
chrUn0039	3547234	4	0
chrUn0040	3476692	0	0
chrUn0041	3349598	2	0
chrUn0042	3408981	2	0
chrUn0043	3418744	0	0
chrUn0044	3269196	0	0
chrUn0045	3251147	2	0
chrUn0046	3280801	0	0
chrUn0047	3099601	0	0
chrUn0048	3019770	2	0
chrUn0049	2714951	2	0
chrUn0050	2712466	2	0
chrUn0051	2523760	2	0
chrUn0052	2474547	0	0
chrUn0053	2614449	0	0
chrUn0054	2406826	0	0
chrUn0055	2319825	2	0
chrUn0056	2329930	2	0
chrUn0057	2309364	0	0
chrUn0058	2313108	0	0
chrUn0059	2141249	0	0
chrUn0060	2069784	0	0
chrUn0061	2081237	2	0
chrUn0062	1918679	0	0
chrUn0063	1881563	0	0
chrUn0064	1864263	2	0
chrUn0065	1900517	2	0
chrUn0066	1685380	0	0
chrUn0067	1664782	0	0
chrUn0068	1522449	2	0
chrUn0069	1641010	2	0
chrUn0070	1593648	0	0
chrUn0071	1786499	0	0
chrUn0072	1611659	0	0
chrUn0073	1617041	0	0
chrUn0074	1467358	0	0
chrUn0075	1467799	0	0
chrUn0076	1505875	0	0
chrUn0077	1466816	0	0
chrUn0078	1418188	0	0
chrUn0079	1399010	2	0
chrUn0080	1510218	0	0
chrUn0081	1394066	0	0
chrUn0082	1255991	0	0
chrUn0083	1277077	0	0
chrUn0084	1224500	0	0
chrUn0085	1045236	0	0
chrUn0086	983784	0	0
chrUn0087	922068	0	0
chrUn0088	975559	0	0
chrUn0089	961758	0	0
chrUn0090	1008836	0	0
chrUn0091	952956	0	0
chrUn0092	909374	0	0
chrUn0093	969689	0	0
chrUn0094	835459	0	0
chrUn0095	844830	0	0
chrUn0096	805605	2	0
chrUn0097	820250	0	0
chrUn0098	746364	0	0
chrUn0099	749006	0	0
chrUn0100	764447	0	0
chrUn0101	717854	0	0
chrUn0102	711466	0	0
chrUn0103	717022	0	0
chrUn0104	658401	0	0
chrUn0105	729872	0	0
chrUn0106	754340	0	0
chrUn0107	655883	0	0
chrUn0108	657726	2	0
chrUn0109	727768	0	0
chrUn0110	651586	0	0
chrUn0111	616762	0	0
chrUn0112	834971	0	0
chrUn0113	667861	0	0
chrUn0114	579758	0	0
chrUn0115	600155	0	0
chrUn0116	644339	0	0
chrUn0117	625358	0	0
chrUn0118	492801	0	0
chrUn0119	485690	0	0
chrUn0120	503624	0	0
chrUn0121	539357	0	0
chrUn0122	486040	0	0
chrUn0123	495383	0	0
chrUn0124	453699	0	0
chrUn0125	491456	0	0
chrUn0126	497037	0	0
chrUn0127	526606	0	0
chrUn0128	453194	2	0
chrUn0129	401994	0	0
chrUn0130	419399	0	0
chrUn0131	440980	0	0
chrUn0132	390156	0	0
chrUn0133	407232	0	0
chrUn0134	483915	0	0
chrUn0135	417969	0	0
chrUn0136	466785	0	0
chrUn0137	389200	0	0
chrUn0138	364349	0	0
chrUn0139	430907	0	0
chrUn0140	361345	0	0
chrUn0141	389875	0	0
chrUn0142	352930	0	0
chrUn0143	339089	0	0
chrUn0144	356114	0	0
chrUn0145	423341	0	0
chrUn0146	425580	2	0
chrUn0147	413174	0	0
chrUn0148	339585	0	0
chrUn0149	350319	2	0
chrUn0150	358653	0	0
chrUn0151	327509	0	0
chrUn0152	340593	0	0
chrUn0153	371981	0	0
chrUn0154	337993	0	0
chrUn0155	304267	0	0
chrUn0156	306863	0	0
chrUn0157	305976	0	0
chrUn0158	276454	0	0
chrUn0159	287981	0	0
chrUn0160	284063	0	0
chrUn0161	305654	0	0
chrUn0162	290843	0	0
chrUn0163	262639	0	0
chrUn0164	320784	0	0
chrUn0165	323045	0	0
chrUn0166	294422	0	0
chrUn0167	407719	0	0
chrUn0168	306477	0	0
chrUn0169	296274	0	0
chrUn0170	263727	0	0
chrUn0171	356776	0	0
chrUn0172	249350	0	0
chrUn0173	256971	0	0
chrUn0174	248875	0	0
chrUn0175	434455	0	0
chrUn0176	259136	0	0
chrUn0177	246253	0	0
chrUn0178	289999	0	0
chrUn0179	260875	0	0
chrUn0180	251762	0	0
chrUn0181	259838	2	0
chrUn0182	327464	0	0
chrUn0183	219444	0	0
chrUn0184	241128	0	0
chrUn0185	218615	0	0
chrUn0186	235814	0	0
chrUn0187	225000	0	0
chrUn0188	215928	0	0
chrUn0189	221297	0	0
chrUn0190	217197	0	0
chrUn0191	208172	0	0
chrUn0192	237470	0	0
chrUn0193	243644	0	0
chrUn0194	239449	0	0
chrUn0195	191353	0	0
chrUn0196	182042	0	0
chrUn0197	244744	0	0
chrUn0198	268730	0	0
chrUn0199	202616	0	0
chrUn0200	174143	0	0
chrUn0201	173121	0	0
chrUn0202	168046	0	0
chrUn0203	218017	0	0
chrUn0204	162562	0	0
chrUn0205	161312	0	0
chrUn0206	174332	0	0
chrUn0207	169770	0	0
chrUn0208	153840	0	0
chrUn0209	182411	0	0
chrUn0210	223038	0	0
chrUn0211	186812	0	0
chrUn0212	194397	0	0
chrUn0213	160349	0	0
chrUn0214	173852	0	0
chrUn0215	145396	0	0
chrUn0216	145132	0	0
chrUn0217	313665	0	0
chrUn0218	143423	0	0
chrUn0219	141745	0	0
chrUn0220	200733	0	0
chrUn0221	286989	0	0
chrUn0222	147490	0	0
chrUn0223	169544	0	0
chrUn0224	138850	0	0
chrUn0225	158159	0	0
chrUn0226	136618	0	0
chrUn0227	187061	0	0
chrUn0228	239553	0	0
chrUn0229	133985	0	0
chrUn0230	129866	0	0
chrUn0231	169243	0	0
chrUn0232	156562	0	0
chrUn0233	127972	0	0
chrUn0234	136694	0	0
chrUn0235	129842	0	0
chrUn0236	139534	0	0
chrUn0237	126538	0	0
chrUn0238	127273	0	0
chrUn0239	122285	0	0
chrUn0240	145241	0	0
chrUn0241	238358	0	0
chrUn0242	132205	0	0
chrUn0243	134139	0	0
chrUn0244	149040	0	0
chrUn0245	122762	0	0
chrUn0246	130840	0	0
chrUn0247	116627	0	0
chrUn0248	116157	0	0
chrUn0249	119838	0	0
chrUn0250	151529	0	0
chrUn0251	115000	0	0
chrUn0252	129158	0	0
chrUn0253	112844	2	0
chrUn0254	112817	0	0
chrUn0255	147641	0	0
chrUn0256	127323	0	0
chrUn0257	141300	0	0
chrUn0258	110655	0	0
chrUn0259	111627	0	0
chrUn0260	120880	0	0
chrUn0261	119753	0	0
chrUn0262	110681	0	0
chrUn0263	128342	0	0
chrUn0264	116284	0	0
chrUn0265	127870	0	0
chrUn0266	106414	0	0
chrUn0267	130236	0	0
chrUn0268	104090	0	0
chrUn0269	118681	0	0
chrUn0270	138132	0	0
chrUn0271	104792	0	0
chrUn0272	101446	0	0
chrUn0273	152063	0	0
chrUn0274	101097	0	0
chrUn0275	131939	0	0
chrUn0276	101132	0	0
chrUn0277	107491	0	0
chrUn0278	98697	0	0
chrUn0279	125536	0	0
chrUn0280	129513	0	0
chrUn0281	143283	0	0
chrUn0282	122728	0	0
chrUn0283	96026	0	0
chrUn0284	95726	0	0
chrUn0285	95576	0	0
chrUn0286	166595	0	0
chrUn0287	99913	0	0
chrUn0288	93842	0	0
chrUn0289	92437	0	0
chrUn0290	92162	0	0
chrUn0291	105551	0	0
chrUn0292	104152	0	0
chrUn0293	91555	0	0
chrUn0294	90797	0	0
chrUn0295	90527	0	0
chrUn0296	89947	0	0
chrUn0297	102349	0	0
chrUn0298	113899	0	0
chrUn0299	88842	0	0
chrUn0300	89450	0	0
chrUn0301	165325	0	0
chrUn0302	108101	0	0
chrUn0303	87141	0	0
chrUn0304	110565	0	0
chrUn0305	86328	0	0
chrUn0306	86279	0	0
chrUn0307	85478	0	0
chrUn0308	86642	0	0
chrUn0309	90936	0	0
chrUn0310	86625	0	0
chrUn0311	92461	0	0
chrUn0312	100436	0	0
chrUn0313	83749	0	0
chrUn0314	82993	0	0
chrUn0315	95268	0	0
chrUn0316	117477	0	0
chrUn0317	82632	0	0
chrUn0318	96526	0	0
chrUn0319	81717	0	0
chrUn0320	81557	0	0
chrUn0321	93178	0	0
chrUn0322	81457	0	0
chrUn0323	111884	0	0
chrUn0324	82035	0	0
chrUn0325	94276	0	0
chrUn0326	93747	0	0
chrUn0327	98155	0	0
chrUn0328	113981	0	0
chrUn0329	80288	0	0
chrUn0330	101797	0	0
chrUn0331	144780	0	0
chrUn0332	78615	0	0
chrUn0333	90291	0	0
chrUn0334	104370	0	0
chrUn0335	94846	0	0
chrUn0336	81428	0	0
chrUn0337	96748	0	0
chrUn0338	77685	0	0
chrUn0339	78386	0	0
chrUn0340	81486	0	0
chrUn0341	76917	0	0
chrUn0342	76887	0	0
chrUn0343	98863	0	0
chrUn0344	106940	0	0
chrUn0345	77564	0	0
chrUn0346	76994	0	0
chrUn0347	95784	0	0
chrUn0348	82563	0	0
chrUn0349	74307	0	0
chrUn0350	92064	0	0
chrUn0351	91521	0	0
chrUn0352	73577	0	0
chrUn0353	135939	0	0
chrUn0354	76533	0	0
chrUn0355	73446	0	0
chrUn0356	78028	0	0
chrUn0357	98560	0	0
chrUn0358	90962	0	0
chrUn0359	74607	0	0
chrUn0360	82814	0	0
chrUn0361	71388	0	0
chrUn0362	79195	0	0
chrUn0363	70837	0	0
chrUn0364	71328	0	0
chrUn0365	109116	0	0
chrUn0366	69667	0	0
chrUn0367	69590	0	0
chrUn0368	69494	0	0
chrUn0369	69374	0	0
chrUn0370	129800	0	0
chrUn0371	68758	0	0
chrUn0372	92354	0	0
chrUn0373	68007	0	0
chrUn0374	67854	0	0
chrUn0375	72291	0	0
chrUn0376	70951	0	0
chrUn0377	73939	0	0
chrUn0378	93386	0	0
chrUn0379	79743	0	0
chrUn0380	66539	0	0
chrUn0381	78850	0	0
chrUn0382	68255	0	0
chrUn0383	127783	0	0
chrUn0384	71848	0	0
chrUn0385	80853	0	0
chrUn0386	74067	0	0
chrUn0387	98602	0	0
chrUn0388	64571	0	0
chrUn0389	64631	0	0
chrUn0390	65135	0	0
chrUn0391	75642	0	0
chrUn0392	87386	0	0
chrUn0393	88249	0	0
chrUn0394	96129	0	0
chrUn0395	65905	0	0
chrUn0396	63572	0	0
chrUn0397	63432	0	0
chrUn0398	63064	0	0
chrUn0399	72178	0	0
chrUn0400	62640	0	0
chrUn0401	94603	0	0
chrUn0402	68825	0	0
chrUn0403	64169	0	0
chrUn0404	85056	0	0
chrUn0405	62612	0	0
chrUn0406	81193	0	0
chrUn0407	67022	0	0
chrUn0408	61068	0	0
chrUn0409	63725	0	0
chrUn0410	62707	0	0
chrUn0411	64353	0	0
chrUn0412	115169	0	0
chrUn0413	61670	0	0
chrUn0414	64141	0	0
chrUn0415	60425	0	0
chrUn0416	63893	0	0
chrUn0417	83806	0	0
chrUn0418	67087	0	0
chrUn0419	65824	0	0
chrUn0420	77125	0	0
chrUn0421	66557	0	0
chrUn0422	60580	0	0
chrUn0423	58927	0	0
chrUn0424	79112	0	0
chrUn0425	58742	0	0
chrUn0426	58308	0	0
chrUn0427	74338	0	0
chrUn0428	58073	0	0
chrUn0429	79588	0	0
chrUn0430	66507	0	0
chrUn0431	62389	0	0
chrUn0432	74786	0	0
chrUn0433	57788	0	0
chrUn0434	57186	0	0
chrUn0435	57371	0	0
chrUn0436	56390	0	0
chrUn0437	55731	0	0
chrUn0438	55126	0	0
chrUn0439	54987	0	0
chrUn0440	65705	0	0
chrUn0441	54719	0	0
chrUn0442	54768	0	0
chrUn0443	54575	0	0
chrUn0444	72865	0	0
chrUn0445	54026	0	0
chrUn0446	53662	0	0
chrUn0447	53284	0	0
chrUn0448	54947	0	0
chrUn0449	52645	0	0
chrUn0450	59153	0	0
chrUn0451	62673	0	0
chrUn0452	57560	0	0
chrUn0453	52616	0	0
chrUn0454	68984	0	0
chrUn0455	51815	0	0
chrUn0456	53078	0	0
chrUn0457	51028	0	0
chrUn0458	50890	0	0
chrUn0459	50478	0	0
chrUn0460	50084	0	0
chrUn0461	64462	0	0
chrUn0462	51618	0	0
chrUn0463	49523	0	0
chrUn0464	49446	0	0
chrUn0465	60164	0	0
chrUn0466	49289	0	0
chrUn0467	49448	0	0
chrUn0468	53155	0	0
chrUn0469	54294	0	0
chrUn0470	49114	0	0
chrUn0471	49191	0	0
chrUn0472	49087	0	0
chrUn0473	48928	0	0
chrUn0474	48740	0	0
chrUn0475	57733	0	0
chrUn0476	49935	0	0
chrUn0477	48628	0	0
chrUn0478	48715	0	0
chrUn0479	48853	0	0
chrUn0480	48533	0	0
chrUn0481	48511	0	0
chrUn0482	51584	0	0
chrUn0483	89331	0	0
chrUn0484	47522	0	0
chrUn0485	46940	0	0
chrUn0486	54997	2	0
chrUn0487	46768	0	0
chrUn0488	46560	0	0
chrUn0489	55512	0	0
chrUn0490	47085	0	0
chrUn0491	45805	0	0
chrUn0492	46855	0	0
chrUn0493	67385	0	0
chrUn0494	58464	0	0
chrUn0495	49685	0	0
chrUn0496	52893	0	0
chrUn0497	45129	0	0
chrUn0498	56442	0	0
chrUn0499	44554	0	0
chrUn0500	68866	0	0
chrUn0501	54474	0	0
chrUn0502	44206	0	0
chrUn0503	49530	0	0
chrUn0504	67288	0	0
chrUn0505	43646	0	0
chrUn0506	43393	0	0
chrUn0507	43332	0	0
chrUn0508	43299	0	0
chrUn0509	43398	0	0
chrUn0510	42746	0	0
chrUn0511	71984	0	0
chrUn0512	53155	0	0
chrUn0513	45737	0	0
chrUn0514	53203	0	0
chrUn0515	42084	0	0
chrUn0516	42084	0	0
chrUn0517	42975	0	0
chrUn0518	41670	0	0
chrUn0519	58348	0	0
chrUn0520	41430	0	0
chrUn0521	43395	0	0
chrUn0522	41186	0	0
chrUn0523	41597	0	0
chrUn0524	51797	0	0
chrUn0525	64750	0	0
chrUn0526	40710	0	0
chrUn0527	41700	0	0
chrUn0528	43354	0	0
chrUn0529	40206	0	0
chrUn0530	43789	0	0
chrUn0531	46707	0	0
chrUn0532	39919	0	0
chrUn0533	54288	0	0
chrUn0534	40664	0	0
chrUn0535	39678	0	0
chrUn0536	55445	0	0
chrUn0537	64046	0	0
chrUn0538	39647	0	0
chrUn0539	64908	0	0
chrUn0540	38225	0	0
chrUn0541	38821	0	0
chrUn0542	37863	0	0
chrUn0543	37860	0	0
chrUn0544	40470	0	0
chrUn0545	37551	0	0
chrUn0546	37538	0	0
chrUn0547	40178	0	0
chrUn0548	66383	0	0
chrUn0549	48265	0	0
chrUn0550	69206	0	0
chrUn0551	36788	0	0
chrUn0552	43147	0	0
chrUn0553	41469	0	0
chrUn0554	35957	0	0
chrUn0555	35653	0	0
chrUn0556	35486	0	0
chrUn0557	35284	0	0
chrUn0558	57823	0	0
chrUn0559	35005	0	0
chrUn0560	38348	0	0
chrUn0561	34927	0	0
chrUn0562	35352	0	0
chrUn0563	34654	0	0
chrUn0564	34622	0	0
chrUn0565	51312	0	0
chrUn0566	34396	0	0
chrUn0567	37149	0	0
chrUn0568	33992	0	0
chrUn0569	33970	0	0
chrUn0570	33924	0	0
chrUn0571	33840	0	0
chrUn0572	34803	0	0
chrUn0573	35242	0	0
chrUn0574	33488	0	0
chrUn0575	33441	0	0
chrUn0576	43102	0	0
chrUn0577	47998	0	0
chrUn0578	61899	0	0
chrUn0579	33122	0	0
chrUn0580	33054	0	0
chrUn0581	33318	0	0
chrUn0582	32974	0	0
chrUn0583	32965	0	0
chrUn0584	59646	0	0
chrUn0585	33778	0	0
chrUn0586	41378	0	0
chrUn0587	32289	0	0
chrUn0588	32279	0	0
chrUn0589	32319	0	0
chrUn0590	32062	0	0
chrUn0591	32345	0	0
chrUn0592	31957	0	0
chrUn0593	52766	0	0
chrUn0594	32234	0	0
chrUn0595	49335	0	0
chrUn0596	30974	0	0
chrUn0597	30956	0	0
chrUn0598	30973	0	0
chrUn0599	30797	0	0
chrUn0600	30393	0	0
chrUn0601	31766	0	0
chrUn0602	30192	0	0
chrUn0603	33812	0	0
chrUn0604	30075	0	0
chrUn0605	30364	0	0
chrUn0606	50635	0	0
chrUn0607	29970	0	0
chrUn0608	33946	0	0
chrUn0609	29637	2	0
chrUn0610	31253	0	0
chrUn0611	29338	0	0
chrUn0612	29117	0	0
chrUn0613	29169	0	0
chrUn0614	28561	0	0
chrUn0615	60393	0	0
chrUn0616	28414	0	0
chrUn0617	28272	0	0
chrUn0618	28219	0	0
chrUn0619	28011	0	0
chrUn0620	27943	0	0
chrUn0621	27806	0	0
chrUn0622	27713	0	0
chrUn0623	27650	0	0
chrUn0624	55717	0	0
chrUn0625	27476	0	0
chrUn0626	27457	0	0
chrUn0627	27455	0	0
chrUn0628	54670	0	0
chrUn0629	27278	0	0
chrUn0630	27197	0	0
chrUn0631	32514	0	0
chrUn0632	27567	0	0
chrUn0633	27042	0	0
chrUn0634	29202	0	0
chrUn0635	52024	0	0
chrUn0636	26594	0	0
chrUn0637	42201	0	0
chrUn0638	26521	0	0
chrUn0639	26432	0	0
chrUn0640	26422	0	0
chrUn0641	26097	0	0
chrUn0642	25971	0	0
chrUn0643	25825	0	0
chrUn0644	27051	0	0
chrUn0645	25730	0	0
chrUn0646	47332	0	0
chrUn0647	25949	0	0
chrUn0648	25409	0	0
chrUn0649	25850	0	0
chrUn0650	25589	0	0
chrUn0651	25200	0	0
chrUn0652	25146	0	0
chrUn0653	25045	0	0
chrUn0654	24857	0	0
chrUn0655	24608	0	0
chrUn0656	24575	0	0
chrUn0657	25639	0	0
chrUn0658	24266	0	0
chrUn0659	24258	0	0
chrUn0660	24224	0	0
chrUn0661	24174	0	0
chrUn0662	24049	0	0
chrUn0663	53785	0	0
chrUn0664	23943	0	0
chrUn0665	23691	0	0
chrUn0666	23497	0	0
chrUn0667	23600	0	0
chrUn0668	23588	0	0
chrUn0669	23073	0	0
chrUn0670	23054	2	0
chrUn0671	22996	0	0
chrUn0672	22983	0	0
chrUn0673	44183	0	0
chrUn0674	22773	0	0
chrUn0675	22731	0	0
chrUn0676	22627	0	0
chrUn0677	22611	0	0
chrUn0678	22587	0	0
chrUn0679	24486	0	0
chrUn0680	22539	0	0
chrUn0681	22536	0	0
chrUn0682	22522	0	0
chrUn0683	22770	0	0
chrUn0684	22389	0	0
chrUn0685	23681	0	0
chrUn0686	22359	0	0
chrUn0687	51884	0	0
chrUn0688	22268	0	0
chrUn0689	22679	0	0
chrUn0690	22166	0	0
chrUn0691	22456	0	0
chrUn0692	23299	0	0
chrUn0693	21877	0	0
chrUn0694	21846	0	0
chrUn0695	22725	0	0
chrUn0696	21812	0	0
chrUn0697	21808	0	0
chrUn0698	21568	0	0
chrUn0699	48751	0	0
chrUn0700	21501	0	0
chrUn0701	21458	0	0
chrUn0702	21421	0	0
chrUn0703	21241	0	0
chrUn0704	38449	2	0
chrUn0705	138731	0	0
chrUn0706	22488	0	0
chrUn0707	20809	0	0
chrUn0708	20754	0	0
chrUn0709	21933	0	0
chrUn0710	20669	0	0
chrUn0711	22220	0	0
chrUn0712	20656	0	0
chrUn0713	20639	0	0
chrUn0714	20634	0	0
chrUn0715	20615	0	0
chrUn0716	20560	0	0
chrUn0717	20476	0	0
chrUn0718	20475	0	0
chrUn0719	20441	0	0
chrUn0720	20072	0	0
chrUn0721	20661	0	0
chrUn0722	19967	0	0
chrUn0723	25584	0	0
chrUn0724	19926	0	0
chrUn0725	19858	0	0
chrUn0726	19659	0	0
chrUn0727	19584	0	0
chrUn0728	19572	0	0
chrUn0729	19523	0	0
chrUn0730	19701	0	0
chrUn0731	19460	0	0
chrUn0732	19424	0	0
chrUn0733	19858	0	0
chrUn0734	19355	0	0
chrUn0735	19320	0	0
chrUn0736	19557	0	0
chrUn0737	20347	0	0
chrUn0738	19068	0	0
chrUn0739	19052	0	0
chrUn0740	19232	0	0
chrUn0741	19165	0	0
chrUn0742	19420	0	0
chrUn0743	18770	0	0
chrUn0744	18770	0	0
chrUn0745	19255	0	0
chrUn0746	18695	0	0
chrUn0747	18823	0	0
chrUn0748	18532	0	0
chrUn0749	18487	0	0
chrUn0750	18374	0	0
chrUn0751	18337	0	0
chrUn0752	18331	0	0
chrUn0753	18211	0	0
chrUn0754	18258	0	0
chrUn0755	18158	0	0
chrUn0756	17921	0	0
chrUn0757	17827	0	0
chrUn0758	23144	0	0
chrUn0759	17641	0	0
chrUn0760	20171	0	0
chrUn0761	17594	0	0
chrUn0762	17550	0	0
chrUn0763	17625	0	0
chrUn0764	18376	0	0
chrUn0765	17409	0	0
chrUn0766	17319	0	0
chrUn0767	17263	0	0
chrUn0768	17180	0	0
chrUn0769	17714	0	0
chrUn0770	17012	0	0
chrUn0771	16932	0	0
chrUn0772	16932	0	0
chrUn0773	16815	0	0
chrUn0774	16790	0	0
chrUn0775	16783	0	0
chrUn0776	17967	0	0
chrUn0777	17533	0	0
chrUn0778	42135	0	0
chrUn0779	16549	0	0
chrUn0780	16540	0	0
chrUn0781	16517	0	0
chrUn0782	16460	0	0
chrUn0783	16423	0	0
chrUn0784	16357	0	0
chrUn0785	16335	0	0
chrUn0786	16313	0	0
chrUn0787	16229	0	0
chrUn0788	16205	0	0
chrUn0789	16192	0	0
chrUn0790	16189	0	0
chrUn0791	16172	0	0
chrUn0792	16172	0	0
chrUn0793	16139	0	0
chrUn0794	16119	0	0
chrUn0795	16112	0	0
chrUn0796	15984	0	0
chrUn0797	17038	0	0
chrUn0798	15939	0	0
chrUn0799	15927	0	0
chrUn0800	16091	0	0
chrUn0801	15789	0	0
chrUn0802	15632	0	0
chrUn0803	15573	0	0
chrUn0804	15562	0	0
chrUn0805	15549	0	0
chrUn0806	15520	0	0
chrUn0807	16581	0	0
chrUn0808	15470	0	0
chrUn0809	15463	0	0
chrUn0810	15333	0	0
chrUn0811	15300	0	0
chrUn0812	16436	0	0
chrUn0813	15295	0	0
chrUn0814	15225	0	0
chrUn0815	15224	0	0
chrUn0816	15223	0	0
chrUn0817	15184	0	0
chrUn0818	15233	0	0
chrUn0819	15125	0	0
chrUn0820	15116	0	0
chrUn0821	16840	0	0
chrUn0822	15786	0	0
chrUn0823	15100	0	0
chrUn0824	15099	0	0
chrUn0825	15195	0	0
chrUn0826	15092	0	0
chrUn0827	15025	0	0
chrUn0828	15103	0	0
chrUn0829	15297	0	0
chrUn0830	14967	0	0
chrUn0831	14964	0	0
chrUn0832	16073	0	0
chrUn0833	18183	0	0
chrUn0834	14887	0	0
chrUn0835	14864	0	0
chrUn0836	14861	0	0
chrUn0837	14819	0	0
chrUn0838	15603	0	0
chrUn0839	14763	0	0
chrUn0840	14760	0	0
chrUn0841	14660	0	0
chrUn0842	14517	0	0
chrUn0843	15631	0	0
chrUn0844	44703	0	0
chrUn0845	14408	0	0
chrUn0846	14696	0	0
chrUn0847	14352	0	0
chrUn0848	14293	0	0
chrUn0849	14274	0	0
chrUn0850	14268	0	0
chrUn0851	14265	0	0
chrUn0852	14367	0	0
chrUn0853	14233	0	0
chrUn0854	14149	0	0
chrUn0855	14134	0	0
chrUn0856	14132	0	0
chrUn0857	14121	0	0
chrUn0858	14064	0	0
chrUn0859	14032	0	0
chrUn0860	14030	0	0
chrUn0861	16235	0	0
chrUn0862	14017	0	0
chrUn0863	14005	0	0
chrUn0864	13985	0	0
chrUn0865	28829	0	0
chrUn0866	13947	0	0
chrUn0867	13938	0	0
chrUn0868	14858	0	0
chrUn0869	13857	0	0
chrUn0870	14257	0	0
chrUn0871	13813	0	0
chrUn0872	13805	0	0
chrUn0873	13772	0	0
chrUn0874	13759	0	0
chrUn0875	13756	0	0
chrUn0876	13733	0	0
chrUn0877	13680	0	0
chrUn0878	13668	0	0
chrUn0879	15425	0	0
chrUn0880	13613	0	0
chrUn0881	13603	0	0
chrUn0882	13599	0	0
chrUn0883	13583	0	0
chrUn0884	13574	0	0
chrUn0885	13674	0	0
chrUn0886	13510	0	0
chrUn0887	13503	0	0
chrUn0888	13492	0	0
chrUn0889	17293	0	0
chrUn0890	13455	0	0
chrUn0891	13415	0	0
chrUn0892	13413	0	0
chrUn0893	14369	0	0
chrUn0894	13401	0	0
chrUn0895	13385	0	0
chrUn0896	13365	0	0
chrUn0897	13339	0	0
chrUn0898	13258	0	0
chrUn0899	13210	0	0
chrUn0900	13207	0	0
chrUn0901	13189	0	0
chrUn0902	13165	0	0
chrUn0903	13128	0	0
chrUn0904	13120	0	0
chrUn0905	13110	0	0
chrUn0906	13048	0	0
chrUn0907	17305	0	0
chrUn0908	13003	0	0
chrUn0909	12985	0	0
chrUn0910	12958	0	0
chrUn0911	12937	0	0
chrUn0912	12924	0	0
chrUn0913	12921	0	0
chrUn0914	12917	0	0
chrUn0915	12906	0	0
chrUn0916	14486	0	0
chrUn0917	12897	0	0
chrUn0918	12884	0	0
chrUn0919	12863	0	0
chrUn0920	12832	0	0
chrUn0921	12824	0	0
chrUn0922	12787	0	0
chrUn0923	12784	0	0
chrUn0924	14958	0	0
chrUn0925	12778	0	0
chrUn0926	12770	0	0
chrUn0927	12742	0	0
chrUn0928	12725	0	0
chrUn0929	12721	0	0
chrUn0930	12706	0	0
chrUn0931	12700	0	0
chrUn0932	12678	0	0
chrUn0933	12668	0	0
chrUn0934	14034	0	0
chrUn0935	12648	0	0
chrUn0936	12637	0	0
chrUn0937	12610	0	0
chrUn0938	12567	0	0
chrUn0939	12561	0	0
chrUn0940	12545	0	0
chrUn0941	13137	0	0
chrUn0942	12526	0	0
chrUn0943	12473	0	0
chrUn0944	12432	0	0
chrUn0945	12407	0	0
chrUn0946	12370	0	0
chrUn0947	12317	0	0
chrUn0948	12253	0	0
chrUn0949	12231	0	0
chrUn0950	12211	0	0
chrUn0951	12840	0	0
chrUn0952	12170	0	0
chrUn0953	12139	0	0
chrUn0954	12102	0	0
chrUn0955	12095	0	0
chrUn0956	12095	0	0
chrUn0957	12088	0	0
chrUn0958	12085	0	0
chrUn0959	12079	0	0
chrUn0960	12067	0	0
chrUn0961	12054	0	0
chrUn0962	12036	0	0
chrUn0963	12026	0	0
chrUn0964	12025	0	0
chrUn0965	12017	0	0
chrUn0966	11999	0	0
chrUn0967	11994	0	0
chrUn0968	11936	0	0
chrUn0969	11935	0	0
chrUn0970	11934	0	0
chrUn0971	11840	0	0
chrUn0972	11830	0	0
chrUn0973	11801	0	0
chrUn0974	11745	0	0
chrUn0975	11727	0	0
chrUn0976	11716	0	0
chrUn0977	11696	0	0
chrUn0978	11693	0	0
chrUn0979	13405	0	0
chrUn0980	11652	0	0
chrUn0981	11638	0	0
chrUn0982	11602	0	0
chrUn0983	11595	0	0
chrUn0984	11595	0	0
chrUn0985	11975	0	0
chrUn0986	11579	0	0
chrUn0987	11569	0	0
chrUn0988	11661	0	0
chrUn0989	11523	0	0
chrUn0990	11500	0	0
chrUn0991	11491	0	0
chrUn0992	11485	0	0
chrUn0993	11456	0	0
chrUn0994	11440	0	0
chrUn0995	11430	0	0
chrUn0996	11409	0	0
chrUn0997	11405	0	0
chrUn0998	11393	0	0
chrUn0999	11338	0	0
chrUn1000	11318	0	0
chrUn1001	11311	0	0
chrUn1002	11409	0	0
chrUn1003	11306	0	0
chrUn1004	11306	0	0
chrUn1005	11266	0	0
chrUn1006	11240	0	0
chrUn1007	11190	0	0
chrUn1008	11186	0	0
chrUn1009	11168	0	0
chrUn1010	11166	0	0
chrUn1011	11162	0	0
chrUn1012	11161	0	0
chrUn1013	11154	0	0
chrUn1014	11150	0	0
chrUn1015	11149	0	0
chrUn1016	11091	0	0
chrUn1017	11074	0	0
chrUn1018	11062	0	0
chrUn1019	11061	0	0
chrUn1020	11041	0	0
chrUn1021	11026	0	0
chrUn1022	11010	0	0
chrUn1023	10957	0	0
chrUn1024	10946	0	0
chrUn1025	10904	0	0
chrUn1026	10879	0	0
chrUn1027	10872	0	0
chrUn1028	10871	0	0
chrUn1029	11829	0	0
chrUn1030	10821	0	0
chrUn1031	10809	0	0
chrUn1032	10809	0	0
chrUn1033	10802	0	0
chrUn1034	10783	0	0
chrUn1035	10778	0	0
chrUn1036	10771	0	0
chrUn1037	10768	0	0
chrUn1038	10754	0	0
chrUn1039	10737	0	0
chrUn1040	10727	0	0
chrUn1041	10710	0	0
chrUn1042	10710	0	0
chrUn1043	10690	0	0
chrUn1044	10681	0	0
chrUn1045	10681	0	0
chrUn1046	10670	0	0
chrUn1047	10667	0	0
chrUn1048	10646	0	0
chrUn1049	10645	0	0
chrUn1050	10640	0	0
chrUn1051	10635	0	0
chrUn1052	10620	0	0
chrUn1053	10606	0	0
chrUn1054	10600	0	0
chrUn1055	10597	0	0
chrUn1056	10588	0	0
chrUn1057	10573	0	0
chrUn1058	10571	0	0
chrUn1059	10567	0	0
chrUn1060	10551	0	0
chrUn1061	10544	0	0
chrUn1062	10518	0	0
chrUn1063	10484	0	0
chrUn1064	10479	0	0
chrUn1065	10473	0	0
chrUn1066	10436	0	0
chrUn1067	10434	0	0
chrUn1068	10433	0	0
chrUn1069	10410	0	0
chrUn1070	10388	0	0
chrUn1071	12459	0	0
chrUn1072	10379	0	0
chrUn1073	10356	0	0
chrUn1074	10326	0	0
chrUn1075	10290	0	0
chrUn1076	11556	0	0
chrUn1077	10278	0	0
chrUn1078	10454	0	0
chrUn1079	10229	0	0
chrUn1080	12699	0	0
chrUn1081	10204	0	0
chrUn1082	10198	0	0
chrUn1083	10177	0	0
chrUn1084	10169	0	0
chrUn1085	10169	0	0
chrUn1086	10140	0	0
chrUn1087	10134	0	0
chrUn1088	10130	0	0
chrUn1089	10125	0	0
chrUn1090	10123	0	0
chrUn1091	10119	0	0
chrUn1092	10117	0	0
chrUn1093	10092	0	0
chrUn1094	10084	0	0
chrUn1095	10084	0	0
chrUn1096	10082	0	0
chrUn1097	10077	0	0
chrUn1098	10070	0	0
chrUn1099	10046	0	0
chrUn1100	10046	0	0
chrUn1101	10040	0	0
chrUn1102	10022	0	0
chrUn1103	10015	0	0
chrUn1104	10594	0	0
chrUn1105	9985	0	0
chrUn1106	9973	0	0
chrUn1107	9972	0	0
chrUn1108	9958	0	0
chrUn1109	10370	0	0
chrUn1110	9907	0	0
chrUn1111	9902	0	0
chrUn1112	9894	0	0
chrUn1113	9877	0	0
chrUn1114	9867	0	0
chrUn1115	9850	0	0
chrUn1116	9849	0	0
chrUn1117	9847	0	0
chrUn1118	9834	0	0
chrUn1119	9827	0	0
chrUn1120	9826	0	0
chrUn1121	9816	0	0
chrUn1122	9785	0	0
chrUn1123	9782	0	0
chrUn1124	9761	0	0
chrUn1125	9750	0	0
chrUn1126	9742	0	0
chrUn1127	9736	0	0
chrUn1128	9733	0	0
chrUn1129	9731	0	0
chrUn1130	9714	0	0
chrUn1131	9714	0	0
chrUn1132	9680	0	0
chrUn1133	9675	0	0
chrUn1134	9674	0	0
chrUn1135	9662	0	0
chrUn1136	9632	0	0
chrUn1137	9632	0	0
chrUn1138	9626	0	0
chrUn1139	9614	0	0
chrUn1140	9607	0	0
chrUn1141	9585	0	0
chrUn1142	9581	0	0
chrUn1143	9575	0	0
chrUn1144	9571	0	0
chrUn1145	9538	0	0
chrUn1146	9531	0	0
chrUn1147	9531	0	0
chrUn1148	9506	0	0
chrUn1149	9491	0	0
chrUn1150	9491	0	0
chrUn1151	9483	0	0
chrUn1152	9483	0	0
chrUn1153	9481	0	0
chrUn1154	9474	0	0
chrUn1155	9466	0	0
chrUn1156	9459	0	0
chrUn1157	9456	0	0
chrUn1158	9456	0	0
chrUn1159	9447	0	0
chrUn1160	9429	0	0
chrUn1161	9426	0	0
chrUn1162	9403	0	0
chrUn1163	9398	0	0
chrUn1164	9392	0	0
chrUn1165	9388	0	0
chrUn1166	9383	0	0
chrUn1167	9383	0	0
chrUn1168	9379	0	0
chrUn1169	9371	0	0
chrUn1170	9371	0	0
chrUn1171	9368	0	0
chrUn1172	9365	0	0
chrUn1173	9363	0	0
chrUn1174	9357	0	0
chrUn1175	9355	0	0
chrUn1176	9355	0	0
chrUn1177	9353	0	0
chrUn1178	9343	0	0
chrUn1179	9343	0	0
chrUn1180	10664	0	0
chrUn1181	9337	0	0
chrUn1182	9334	0	0
chrUn1183	9331	0	0
chrUn1184	9330	0	0
chrUn1185	9318	0	0
chrUn1186	9312	0	0
chrUn1187	9306	0	0
chrUn1188	9306	0	0
chrUn1189	9305	0	0
chrUn1190	9297	0	0
chrUn1191	9295	0	0
chrUn1192	9279	0	0
chrUn1193	9278	0	0
chrUn1194	9275	0	0
chrUn1195	9274	0	0
chrUn1196	9272	0	0
chrUn1197	9270	0	0
chrUn1198	9255	0	0
chrUn1199	9248	0	0
chrUn1200	9247	0	0
chrUn1201	9229	0	0
chrUn1202	9224	0	0
chrUn1203	9217	0	0
chrUn1204	9196	0	0
chrUn1205	9195	0	0
chrUn1206	9195	0	0
chrUn1207	9184	0	0
chrUn1208	9178	0	0
chrUn1209	10536	0	0
chrUn1210	9159	0	0
chrUn1211	9150	0	0
chrUn1212	9146	0	0
chrUn1213	10824	0	0
chrUn1214	9102	0	0
chrUn1215	9101	0	0
chrUn1216	9101	0	0
chrUn1217	9097	0	0
chrUn1218	9083	0	0
chrUn1219	9082	0	0
chrUn1220	9074	0	0
chrUn1221	9073	0	0
chrUn1222	9067	0	0
chrUn1223	9063	0	0
chrUn1224	9051	0	0
chrUn1225	10839	0	0
chrUn1226	9028	0	0
chrUn1227	12558	0	0
chrUn1228	9011	0	0
chrUn1229	9003	0	0
chrUn1230	8999	0	0
chrUn1231	8997	0	0
chrUn1232	8992	0	0
chrUn1233	8972	0	0
chrUn1234	8960	0	0
chrUn1235	8959	0	0
chrUn1236	8953	0	0
chrUn1237	8951	0	0
chrUn1238	8951	0	0
chrUn1239	8948	0	0
chrUn1240	9680	0	0
chrUn1241	8894	0	0
chrUn1242	8892	0	0
chrUn1243	8856	0	0
chrUn1244	8810	0	0
chrUn1245	8797	0	0
chrUn1246	8797	0	0
chrUn1247	8789	0	0
chrUn1248	8785	0	0
chrUn1249	8782	0	0
chrUn1250	8779	0	0
chrUn1251	8758	0	0
chrUn1252	8749	0	0
chrUn1253	8729	0	0
chrUn1254	8724	0	0
chrUn1255	8702	0	0
chrUn1256	8699	0	0
chrUn1257	8693	0	0
chrUn1258	8682	0	0
chrUn1259	8682	0	0
chrUn1260	8676	0	0
chrUn1261	8672	0	0
chrUn1262	9638	0	0
chrUn1263	8654	0	0
chrUn1264	8644	0	0
chrUn1265	8642	0	0
chrUn1266	8641	0	0
chrUn1267	8639	0	0
chrUn1268	8634	0	0
chrUn1269	8631	0	0
chrUn1270	8626	0	0
chrUn1271	8626	0	0
chrUn1272	8625	0	0
chrUn1273	8624	0	0
chrUn1274	8604	0	0
chrUn1275	8601	0	0
chrUn1276	8596	0	0
chrUn1277	8582	0	0
chrUn1278	8578	0	0
chrUn1279	8573	0	0
chrUn1280	8571	0	0
chrUn1281	8563	0	0
chrUn1282	8555	0	0
chrUn1283	8554	0	0
chrUn1284	8554	0	0
chrUn1285	8514	0	0
chrUn1286	8508	0	0
chrUn1287	8505	0	0
chrUn1288	8494	0	0
chrUn1289	8491	0	0
chrUn1290	8488	0	0
chrUn1291	8485	0	0
chrUn1292	8478	0	0
chrUn1293	8470	0	0
chrUn1294	8464	0	0
chrUn1295	8464	0	0
chrUn1296	8458	0	0
chrUn1297	8455	0	0
chrUn1298	8455	0	0
chrUn1299	8454	0	0
chrUn1300	8677	0	0
chrUn1301	8439	0	0
chrUn1302	8434	0	0
chrUn1303	8434	0	0
chrUn1304	8430	0	0
chrUn1305	8427	0	0
chrUn1306	8427	0	0
chrUn1307	8417	0	0
chrUn1308	8412	0	0
chrUn1309	8401	0	0
chrUn1310	8394	0	0
chrUn1311	8394	0	0
chrUn1312	8393	0	0
chrUn1313	8390	0	0
chrUn1314	8385	0	0
chrUn1315	8382	0	0
chrUn1316	8365	0	0
chrUn1317	8359	0	0
chrUn1318	8351	0	0
chrUn1319	8349	0	0
chrUn1320	8317	0	0
chrUn1321	8316	0	0
chrUn1322	8308	0	0
chrUn1323	8287	0	0
chrUn1324	8283	0	0
chrUn1325	8282	0	0
chrUn1326	8277	0	0
chrUn1327	8277	0	0
chrUn1328	8274	0	0
chrUn1329	8262	0	0
chrUn1330	8253	0	0
chrUn1331	8246	0	0
chrUn1332	8245	0	0
chrUn1333	8225	0	0
chrUn1334	8223	0	0
chrUn1335	8222	0	0
chrUn1336	8199	0	0
chrUn1337	8195	0	0
chrUn1338	8192	0	0
chrUn1339	8181	0	0
chrUn1340	8180	0	0
chrUn1341	8178	0	0
chrUn1342	8174	0	0
chrUn1343	8173	0	0
chrUn1344	8166	0	0
chrUn1345	9431	0	0
chrUn1346	8148	0	0
chrUn1347	8142	0	0
chrUn1348	8142	0	0
chrUn1349	8140	0	0
chrUn1350	8126	0	0
chrUn1351	8121	0	0
chrUn1352	8117	0	0
chrUn1353	8104	0	0
chrUn1354	8102	0	0
chrUn1355	8102	0	0
chrUn1356	8440	0	0
chrUn1357	8086	0	0
chrUn1358	8082	0	0
chrUn1359	8065	0	0
chrUn1360	8049	0	0
chrUn1361	8043	0	0
chrUn1362	8041	0	0
chrUn1363	8033	0	0
chrUn1364	8031	0	0
chrUn1365	8017	0	0
chrUn1366	8010	0	0
chrUn1367	8010	0	0
chrUn1368	8227	0	0
chrUn1369	7995	0	0
chrUn1370	7990	0	0
chrUn1371	7979	0	0
chrUn1372	7979	0	0
chrUn1373	7977	0	0
chrUn1374	7972	0	0
chrUn1375	7970	0	0
chrUn1376	7966	0	0
chrUn1377	7965	0	0
chrUn1378	7958	0	0
chrUn1379	7956	0	0
chrUn1380	7955	0	0
chrUn1381	7954	0	0
chrUn1382	7947	0	0
chrUn1383	7941	0	0
chrUn1384	7940	0	0
chrUn1385	7939	0	0
chrUn1386	8039	0	0
chrUn1387	11692	0	0
chrUn1388	7924	0	0
chrUn1389	7920	0	0
chrUn1390	7914	0	0
chrUn1391	7906	0	0
chrUn1392	7902	0	0
chrUn1393	7899	0	0
chrUn1394	7892	0	0
chrUn1395	7889	0	0
chrUn1396	7882	0	0
chrUn1397	7879	0	0
chrUn1398	7869	0	0
chrUn1399	7864	0	0
chrUn1400	7859	0	0
chrUn1401	7856	0	0
chrUn1402	7855	0	0
chrUn1403	7847	0	0
chrUn1404	7829	0	0
chrUn1405	7825	0	0
chrUn1406	7823	0	0
chrUn1407	7819	0	0
chrUn1408	7819	0	0
chrUn1409	7802	0	0
chrUn1410	7791	0	0
chrUn1411	7789	0	0
chrUn1412	7781	0	0
chrUn1413	7777	0	0
chrUn1414	7775	0	0
chrUn1415	7773	0	0
chrUn1416	7767	0	0
chrUn1417	7765	0	0
chrUn1418	7762	0	0
chrUn1419	7760	0	0
chrUn1420	8833	0	0
chrUn1421	7722	0	0
chrUn1422	7721	0	0
chrUn1423	7719	0	0
chrUn1424	7707	0	0
chrUn1425	7705	0	0
chrUn1426	7685	0	0
chrUn1427	7681	0	0
chrUn1428	7673	0	0
chrUn1429	7670	0	0
chrUn1430	7659	0	0
chrUn1431	7645	0	0
chrUn1432	7642	0	0
chrUn1433	7637	0	0
chrUn1434	7635	0	0
chrUn1435	7633	0	0
chrUn1436	7633	0	0
chrUn1437	7628	0	0
chrUn1438	7626	0	0
chrUn1439	7625	0	0
chrUn1440	7620	0	0
chrUn1441	7607	0	0
chrUn1442	7602	0	0
chrUn1443	7600	0	0
chrUn1444	7592	0	0
chrUn1445	7591	0	0
chrUn1446	7588	0	0
chrUn1447	7587	0	0
chrUn1448	7586	0	0
chrUn1449	7585	0	0
chrUn1450	7582	0	0
chrUn1451	7571	0	0
chrUn1452	7559	0	0
chrUn1453	7557	0	0
chrUn1454	7555	0	0
chrUn1455	7554	0	0
chrUn1456	7553	0	0
chrUn1457	7542	0	0
chrUn1458	7535	0	0
chrUn1459	7534	0	0
chrUn1460	7531	0	0
chrUn1461	7529	0	0
chrUn1462	7520	0	0
chrUn1463	7513	0	0
chrUn1464	7512	0	0
chrUn1465	7506	0	0
chrUn1466	7505	0	0
chrUn1467	7504	0	0
chrUn1468	7497	0	0
chrUn1469	7492	0	0
chrUn1470	7490	0	0
chrUn1471	7489	0	0
chrUn1472	7488	0	0
chrUn1473	7486	0	0
chrUn1474	7486	0	0
chrUn1475	7484	0	0
chrUn1476	7480	0	0
chrUn1477	7476	0	0
chrUn1478	7468	0	0
chrUn1479	7462	0	0
chrUn1480	7441	0	0
chrUn1481	7440	0	0
chrUn1482	7440	0	0
chrUn1483	7438	0	0
chrUn1484	7432	0	0
chrUn1485	7428	0	0
chrUn1486	7421	0	0
chrUn1487	7415	0	0
chrUn1488	7414	0	0
chrUn1489	7412	0	0
chrUn1490	7409	0	0
chrUn1491	7409	0	0
chrUn1492	7404	0	0
chrUn1493	7403	0	0
chrUn1494	7397	0	0
chrUn1495	7393	0	0
chrUn1496	7393	0	0
chrUn1497	7391	0	0
chrUn1498	7390	0	0
chrUn1499	7385	0	0
chrUn1500	7376	0	0
chrUn1501	7365	0	0
chrUn1502	7359	0	0
chrUn1503	7359	0	0
chrUn1504	7349	0	0
chrUn1505	7348	0	0
chrUn1506	7345	0	0
chrUn1507	7344	0	0
chrUn1508	7336	0	0
chrUn1509	7327	0	0
chrUn1510	7309	0	0
chrUn1511	7308	0	0
chrUn1512	7308	0	0
chrUn1513	7294	0	0
chrUn1514	7293	0	0
chrUn1515	7284	0	0
chrUn1516	7284	0	0
chrUn1517	7282	0	0
chrUn1518	7271	0	0
chrUn1519	7270	0	0
chrUn1520	7269	0	0
chrUn1521	7263	0	0
chrUn1522	7241	0	0
chrUn1523	7241	0	0
chrUn1524	7238	0	0
chrUn1525	7237	0	0
chrUn1526	7233	0	0
chrUn1527	7226	0	0
chrUn1528	7223	0	0
chrUn1529	7218	0	0
chrUn1530	7217	0	0
chrUn1531	7214	0	0
chrUn1532	7214	0	0
chrUn1533	7213	0	0
chrUn1534	7211	0	0
chrUn1535	7205	0	0
chrUn1536	7204	0	0
chrUn1537	7199	0	0
chrUn1538	7197	0	0
chrUn1539	7192	0	0
chrUn1540	7190	0	0
chrUn1541	7183	0	0
chrUn1542	7183	0	0
chrUn1543	7175	0	0
chrUn1544	7175	0	0
chrUn1545	7173	0	0
chrUn1546	7172	0	0
chrUn1547	7170	0	0
chrUn1548	7521	0	0
chrUn1549	7165	0	0
chrUn1550	7165	0	0
chrUn1551	7158	0	0
chrUn1552	7155	0	0
chrUn1553	7150	0	0
chrUn1554	7150	0	0
chrUn1555	7150	0	0
chrUn1556	7148	0	0
chrUn1557	7145	0	0
chrUn1558	7141	0	0
chrUn1559	7128	0	0
chrUn1560	7113	0	0
chrUn1561	7105	0	0
chrUn1562	7102	0	0
chrUn1563	7098	0	0
chrUn1564	7087	0	0
chrUn1565	7087	0	0
chrUn1566	7086	0	0
chrUn1567	7083	0	0
chrUn1568	7066	0	0
chrUn1569	7056	0	0
chrUn1570	7051	0	0
chrUn1571	7045	0	0
chrUn1572	7040	0	0
chrUn1573	7039	0	0
chrUn1574	7039	0	0
chrUn1575	7038	0	0
chrUn1576	7038	0	0
chrUn1577	7033	0	0
chrUn1578	7032	0	0
chrUn1579	7028	0	0
chrUn1580	7027	0	0
chrUn1581	7027	0	0
chrUn1582	7022	0	0
chrUn1583	7017	0	0
chrUn1584	7016	0	0
chrUn1585	7015	0	0
chrUn1586	7013	0	0
chrUn1587	7013	0	0
chrUn1588	7000	0	0
chrUn1589	6994	0	0
chrUn1590	6993	0	0
chrUn1591	6991	0	0
chrUn1592	6990	0	0
chrUn1593	6989	0	0
chrUn1594	6977	0	0
chrUn1595	6976	0	0
chrUn1596	6972	0	0
chrUn1597	6967	0	0
chrUn1598	6966	0	0
chrUn1599	8593	0	0
chrUn1600	6961	0	0
chrUn1601	6954	0	0
chrUn1602	6950	0	0
chrUn1603	6945	0	0
chrUn1604	6930	0	0
chrUn1605	6930	0	0
chrUn1606	6930	0	0
chrUn1607	6928	0	0
chrUn1608	6927	0	0
chrUn1609	6924	0	0
chrUn1610	6924	0	0
chrUn1611	6920	0	0
chrUn1612	6919	0	0
chrUn1613	6917	0	0
chrUn1614	6904	0	0
chrUn1615	6904	0	0
chrUn1616	6900	0	0
chrUn1617	6897	0	0
chrUn1618	6892	0	0
chrUn1619	6888	0	0
chrUn1620	6883	0	0
chrUn1621	6882	0	0
chrUn1622	6879	0	0
chrUn1623	6870	0	0
chrUn1624	6861	0	0
chrUn1625	6855	0	0
chrUn1626	6852	0	0
chrUn1627	6848	0	0
chrUn1628	6840	0	0
chrUn1629	6834	0	0
chrUn1630	6830	0	0
chrUn1631	6826	0	0
chrUn1632	6824	0	0
chrUn1633	6811	0	0
chrUn1634	6810	0	0
chrUn1635	6801	0	0
chrUn1636	6800	0	0
chrUn1637	6798	0	0
chrUn1638	6789	0	0
chrUn1639	6788	0	0
chrUn1640	8132	0	0
chrUn1641	6770	0	0
chrUn1642	6769	0	0
chrUn1643	6765	0	0
chrUn1644	6763	0	0
chrUn1645	6762	0	0
chrUn1646	6760	0	0
chrUn1647	6760	0	0
chrUn1648	6757	0	0
chrUn1649	6756	0	0
chrUn1650	6756	0	0
chrUn1651	6756	0	0
chrUn1652	6755	0	0
chrUn1653	6751	0	0
chrUn1654	6750	0	0
chrUn1655	6744	0	0
chrUn1656	6735	0	0
chrUn1657	6728	0	0
chrUn1658	6728	0	0
chrUn1659	6723	0	0
chrUn1660	6720	0	0
chrUn1661	6716	0	0
chrUn1662	6715	0	0
chrUn1663	6713	0	0
chrUn1664	6706	0	0
chrUn1665	6705	0	0
chrUn1666	6698	0	0
chrUn1667	6692	0	0
chrUn1668	6690	0	0
chrUn1669	6689	0	0
chrUn1670	6687	0	0
chrUn1671	6685	0	0
chrUn1672	6683	0	0
chrUn1673	6682	0	0
chrUn1674	6679	0	0
chrUn1675	6677	0	0
chrUn1676	6672	0	0
chrUn1677	6667	0	0
chrUn1678	6659	0	0
chrUn1679	6656	0	0
chrUn1680	6654	0	0
chrUn1681	6651	0	0
chrUn1682	6651	0	0
chrUn1683	6646	0	0
chrUn1684	6645	0	0
chrUn1685	6643	0	0
chrUn1686	6643	0	0
chrUn1687	6642	0	0
chrUn1688	6641	0	0
chrUn1689	6638	0	0
chrUn1690	6636	0	0
chrUn1691	6628	0	0
chrUn1692	6592	0	0
chrUn1693	6591	0	0
chrUn1694	6582	0	0
chrUn1695	6576	0	0
chrUn1696	6576	0	0
chrUn1697	6575	0	0
chrUn1698	6575	0	0
chrUn1699	6571	0	0
chrUn1700	6561	0	0
chrUn1701	6557	0	0
chrUn1702	6556	0	0
chrUn1703	6555	0	0
chrUn1704	6553	0	0
chrUn1705	6653	0	0
chrUn1706	6551	0	0
chrUn1707	6542	0	0
chrUn1708	6541	0	0
chrUn1709	6531	0	0
chrUn1710	6530	0	0
chrUn1711	6528	0	0
chrUn1712	6523	0	0
chrUn1713	6522	0	0
chrUn1714	6521	0	0
chrUn1715	6521	0	0
chrUn1716	6521	0	0
chrUn1717	6519	0	0
chrUn1718	6512	0	0
chrUn1719	6505	0	0
chrUn1720	6502	0	0
chrUn1721	6502	0	0
chrUn1722	6500	0	0
chrUn1723	6500	0	0
chrUn1724	6497	0	0
chrUn1725	6495	0	0
chrUn1726	6486	0	0
chrUn1727	6482	0	0
chrUn1728	6482	0	0
chrUn1729	6482	0	0
chrUn1730	6481	0	0
chrUn1731	6481	0	0
chrUn1732	6477	0	0
chrUn1733	6476	0	0
chrUn1734	6475	0	0
chrUn1735	6475	0	0
chrUn1736	6465	0	0
chrUn1737	6464	0	0
chrUn1738	6463	0	0
chrUn1739	6462	0	0
chrUn1740	6458	0	0
chrUn1741	6456	0	0
chrUn1742	6455	0	0
chrUn1743	6446	0	0
chrUn1744	6444	0	0
chrUn1745	6441	0	0
chrUn1746	6441	0	0
chrUn1747	6439	0	0
chrUn1748	6434	0	0
chrUn1749	6428	0	0
chrUn1750	6426	0	0
chrUn1751	6523	0	0
chrUn1752	6420	0	0
chrUn1753	7144	0	0
chrUn1754	6411	0	0
chrUn1755	6408	0	0
chrUn1756	6405	0	0
chrUn1757	6404	0	0
chrUn1758	6401	0	0
chrUn1759	6399	0	0
chrUn1760	6399	0	0
chrUn1761	6397	0	0
chrUn1762	6392	0	0
chrUn1763	6389	0	0
chrUn1764	6385	0	0
chrUn1765	6376	0	0
chrUn1766	6376	0	0
chrUn1767	6375	0	0
chrUn1768	6363	0	0
chrUn1769	6362	0	0
chrUn1770	6357	0	0
chrUn1771	6356	0	0
chrUn1772	6350	0	0
chrUn1773	6349	0	0
chrUn1774	6348	0	0
chrUn1775	6338	0	0
chrUn1776	6332	0	0
chrUn1777	6331	0	0
chrUn1778	6327	0	0
chrUn1779	6315	0	0
chrUn1780	6313	0	0
chrUn1781	6308	0	0
chrUn1782	6302	0	0
chrUn1783	6299	0	0
chrUn1784	6298	0	0
chrUn1785	6296	0	0
chrUn1786	6295	0	0
chrUn1787	6295	0	0
chrUn1788	6292	0	0
chrUn1789	6291	0	0
chrUn1790	6289	0	0
chrUn1791	6286	0	0
chrUn1792	6282	0	0
chrUn1793	6279	0	0
chrUn1794	6278	0	0
chrUn1795	6275	0	0
chrUn1796	6273	0	0
chrUn1797	6264	0	0
chrUn1798	6255	0	0
chrUn1799	6249	0	0
chrUn1800	6243	0	0
chrUn1801	6242	0	0
chrUn1802	6240	0	0
chrUn1803	6239	0	0
chrUn1804	6237	0	0
chrUn1805	6236	0	0
chrUn1806	6220	0	0
chrUn1807	6219	0	0
chrUn1808	6208	0	0
chrUn1809	6208	0	0
chrUn1810	6207	0	0
chrUn1811	6201	0	0
chrUn1812	6200	0	0
chrUn1813	6196	0	0
chrUn1814	6189	0	0
chrUn1815	6188	0	0
chrUn1816	6187	0	0
chrUn1817	6183	0	0
chrUn1818	6177	0	0
chrUn1819	6166	0	0
chrUn1820	6166	0	0
chrUn1821	6160	0	0
chrUn1822	6157	0	0
chrUn1823	6156	0	0
chrUn1824	6149	0	0
chrUn1825	6147	0	0
chrUn1826	6141	0	0
chrUn1827	6130	0	0
chrUn1828	6122	0	0
chrUn1829	6113	0	0
chrUn1830	6112	0	0
chrUn1831	6111	0	0
chrUn1832	6101	0	0
chrUn1833	6099	0	0
chrUn1834	6096	0	0
chrUn1835	6089	0	0
chrUn1836	6088	0	0
chrUn1837	6086	0	0
chrUn1838	6084	0	0
chrUn1839	6082	0	0
chrUn1840	6075	0	0
chrUn1841	6072	0	0
chrUn1842	6070	0	0
chrUn1843	6056	0	0
chrUn1844	6055	0	0
chrUn1845	6054	0	0
chrUn1846	6048	0	0
chrUn1847	6046	0	0
chrUn1848	6045	0	0
chrUn1849	6040	0	0
chrUn1850	6035	0	0
chrUn1851	6035	0	0
chrUn1852	6027	0	0
chrUn1853	6026	0	0
chrUn1854	6022	0	0
chrUn1855	6021	0	0
chrUn1856	6021	0	0
chrUn1857	6017	0	0
chrUn1858	6014	0	0
chrUn1859	6014	0	0
chrUn1860	6002	0	0
chrUn1861	5999	0	0
chrUn1862	5998	0	0
chrUn1863	5995	0	0
chrUn1864	5989	0	0
chrUn1865	5983	0	0
chrUn1866	5975	0	0
chrUn1867	5973	0	0
chrUn1868	5971	0	0
chrUn1869	5971	0	0
chrUn1870	5968	0	0
chrUn1871	5967	0	0
chrUn1872	5967	0	0
chrUn1873	5964	0	0
chrUn1874	5963	0	0
chrUn1875	5952	0	0
chrUn1876	5950	0	0
chrUn1877	5950	0	0
chrUn1878	5948	0	0
chrUn1879	5947	0	0
chrUn1880	5946	0	0
chrUn1881	5943	0	0
chrUn1882	5943	0	0
chrUn1883	5941	0	0
chrUn1884	5940	0	0
chrUn1885	5939	0	0
chrUn1886	5933	0	0
chrUn1887	5929	0	0
chrUn1888	5928	0	0
chrUn1889	5922	0	0
chrUn1890	5918	0	0
chrUn1891	5915	0	0
chrUn1892	5912	0	0
chrUn1893	5911	0	0
chrUn1894	5910	0	0
chrUn1895	5910	0	0
chrUn1896	5906	0	0
chrUn1897	5903	0	0
chrUn1898	5898	0	0
chrUn1899	5896	0	0
chrUn1900	5882	0	0
chrUn1901	5881	0	0
chrUn1902	5880	0	0
chrUn1903	5880	0	0
chrUn1904	5880	0	0
chrUn1905	5878	0	0
chrUn1906	5871	0	0
chrUn1907	5871	0	0
chrUn1908	5869	0	0
chrUn1909	5866	0	0
chrUn1910	5860	0	0
chrUn1911	5859	0	0
chrUn1912	5856	0	0
chrUn1913	5855	0	0
chrUn1914	5848	0	0
chrUn1915	5846	0	0
chrUn1916	5844	0	0
chrUn1917	5844	0	0
chrUn1918	5841	0	0
chrUn1919	5839	0	0
chrUn1920	5829	0	0
chrUn1921	5827	0	0
chrUn1922	5825	0	0
chrUn1923	5824	0	0
chrUn1924	5821	0	0
chrUn1925	5819	0	0
chrUn1926	5817	0	0
chrUn1927	5815	0	0
chrUn1928	5814	0	0
chrUn1929	5811	0	0
chrUn1930	5810	0	0
chrUn1931	5806	0	0
chrUn1932	5802	0	0
chrUn1933	5802	0	0
chrUn1934	5798	0	0
chrUn1935	5797	0	0
chrUn1936	5790	0	0
chrUn1937	5788	0	0
chrUn1938	5787	0	0
chrUn1939	5785	0	0
chrUn1940	5783	0	0
chrUn1941	5782	0	0
chrUn1942	5779	0	0
chrUn1943	5775	0	0
chrUn1944	5771	0	0
chrUn1945	5767	0	0
chrUn1946	5766	0	0
chrUn1947	5765	0	0
chrUn1948	5765	0	0
chrUn1949	5761	0	0
chrUn1950	5759	0	0
chrUn1951	5758	0	0
chrUn1952	5756	0	0
chrUn1953	5756	0	0
chrUn1954	5753	0	0
chrUn1955	5752	0	0
chrUn1956	5751	0	0
chrUn1957	5747	0	0
chrUn1958	5741	0	0
chrUn1959	5734	0	0
chrUn1960	5734	0	0
chrUn1961	5733	0	0
chrUn1962	5732	0	0
chrUn1963	5729	0	0
chrUn1964	5728	0	0
chrUn1965	5727	0	0
chrUn1966	5726	0	0
chrUn1967	5725	0	0
chrUn1968	5724	0	0
chrUn1969	5717	0	0
chrUn1970	5716	0	0
chrUn1971	5714	0	0
chrUn1972	5711	0	0
[truncated: 304 more rows]
